# Supplementary material for: Switching Antipsychotic Medications in People with Schizophrenia: A 4-Year Naturalistic Study
Source: MDPI journal article supplement (doi:10.3390/jcm11195965), 2022-10-10
Supplement: s1 [file s1]

**Supplementary Table S1. Number and percentages of patients who switched the baseline antipsychotic (AP) at the study end point according to the medication at baseline**

| AP Class | AP combination | Long-acting |   | No switch | AP switch | AP class switch | Switch to Clozapine | Total |
|----------|----------------|-------------|---|-----------|-----------|-----------------|---------------------|-------|
| SGA      | No             | No          | n | 199       | 63        | 23              | 26                  | 311   |
|          |                |             | % | 64        | 20        | 7.4             | 8.4                 |       |
|          |                | Yes         | n | 14        | 10        | 2               | 2                   | 28    |
|          |                |             | % | 50        | 35.8      | 7.1             | 7.1                 |       |
|          | Yes            | No          | n | 40        | 4         | 4               | 4                   | 52    |
|          |                |             | % | 76.9      | 7.7       | 7.7             | 7.7                 |       |
|          |                | Yes         | n | 9         | 3         | 2               | 1                   | 15    |
|          |                |             | % | 60        | 20        | 13.3            | 6.7                 |       |
| FGA      | No             | No          | n | 30        | 4         | 10              | 7                   | 51    |
|          |                |             | % | 58.8      | 7.8       | 19.6            | 13.7                |       |
|          |                | Yes         | n | 11        | 1         | 3               | 0                   | 15    |
|          |                |             | % | 73.3      | 6.7       | 20.0            |                     |       |
|          | Yes            | No          | n | 53        | 10        | 6               | 3                   | 72    |
|          |                |             | % | 73.6      | 13.9      | 8.3             | 4.2                 |       |
|          |                | Yes         | n | 16        | 5         | 2               | 4                   | 27    |
|          |                |             | % | 59.3      | 18.5      | 7.4             | 14.8                |       |
|          |                | Total       | n | 110       | 20        | 21              | 14                  | 165   |
|          |                |             | % | 66.7      | 12.1      | 12.7            | 8.5                 |       |
